# Supplementary material for: New Ref-1/APE1 targeted inhibitors demonstrating improved potency for clinical applications in multiple cancer types
Source: PubMed Central journal article supplement — Pharmacol Res. Author manuscript; Available in PMC 2024 Mar 25. (PMC10962275; doi:10.1016/j.phrs.2024.107092), 2024-02-02
Supplement: NIHMS1971219-supplement-3.pdf [file NIHMS1971219-supplement-3.pdf]

FINAL REPORT OF LABORATORY EXAMINATION

4011 Discovery Drive, Columbia, MO 65201

1-800-669-0825 1-573-499-5700

[idxxbioanalytics@idexx.com](mailto:idxxbioanalytics@idexx.com)

[www.idexxbioanalytics.com](http://www.idexxbioanalytics.com)

IDEXX BioAnalytics Case # 26567-2021

Received Date: 8/31/2021

Completed: 9/3/2021

Submitted By

Olivia Babb  
 Indiana University School of Medicine  
 Fishel Lab, Wells Center  
 1044 West Walnut St. R4-304  
 Indianapolis, IN 46202

Phone: 317-278-0579  
 Email: obabb@iu.edu

Specimen Description

Species: human

Description: Cells

Number of Specimens/Animals: 10

| ID | Client ID | Cell Line | Species |
|----|-----------|-----------|---------|
| 1  | MPNST R-1 | RHT172    | human   |
| 2  | UH2102-13 | UH2101-13 | human   |
| 3  | Pa03C     | Pa03C     | human   |
| 4  | PDAC PDX  | UH2101-01 | human   |
| 5  | R-HT 172  | RHT172    | human   |
| 6  | JH2-002   | JH2-002   | human   |
| 7  | JH2-103   | JH2-103   | human   |
| 8  | JH2-07903 | JH2-079-3 | human   |
| 9  | Panc14C   | Panc14C   | human   |
| 10 | Pa02C mOU | Pa02C     | human   |

**Services/Tests Performed:** CellCheck 9 Plus - human (Cell Check 9 with Mycoplasma) (1-10)

**PCR evaluation for:** *Mycoplasma* sp.

**Genetic evaluation for:** Human 9-Marker STR Profile, Interspecies Contamination Test

**Summary:** Cell Check results are provided in the data results section for each sample. For human samples, an identity matching score above 80% indicates the sample is consistent with the cell line of origin. For human samples with less than an 80% matching score, please see individual comments for these samples in the detail section.

All other test results were negative. Please see the report for details.

## PCR EVALUATION

| cells                 | 1 | 2 | 3 | 4 | 5 | 6 | 7 | 8 | 9 | 10 |
|-----------------------|---|---|---|---|---|---|---|---|---|----|
| <i>Mycoplasma</i> sp. | - | - | - | - | - | - | - | - | - | -  |

Legend: + = positive - = negative id:id = pooled sample range id+id+id = non-range pooled sample NT or blank = no test performed sus = suspect wps = weak positive XX = Testing in progress

## CELL CHECK

### Species-specific PCR Evaluation

| Species              | 1 | 2 | 3 | 4 | 5 | 6 | 7 | 8 | 9 | 10 |
|----------------------|---|---|---|---|---|---|---|---|---|----|
| mouse                | + | + | - | + | + | - | - | - | - | +  |
| rat                  | - | - | - | - | - | - | - | - | - | -  |
| human                | + | + | + | + | + | + | + | + | + | +  |
| Chinese hamster      | - | - | - | - | - | - | - | - | - | -  |
| African green monkey | - | - | - | - | - | - | - | - | - | -  |

### Marker Analysis

| Marker Name    | 1                 |        | 2                 |           | 3                 |       | 4                 |           | 5              |                           | 6                 |         |
|----------------|-------------------|--------|-------------------|-----------|-------------------|-------|-------------------|-----------|----------------|---------------------------|-------------------|---------|
|                | Sample Results    | RHT172 | Sample Results    | UH2101-13 | Sample Results    | Pa03C | Sample Results    | UH2101-03 | Sample Results | RHT172 (IBA# 26567-21-01) | Sample Results    | JH2-002 |
| AMEL           | X                 | NA     | X, Y              | NA        | X, Y              | NA    | X, Y              | NA        | X              | X                         | X                 | NA      |
| CSF1PO         | 11                | NA     | 10                | NA        | 12                | NA    | 12                | NA        | 11             | 11                        | 11                | NA      |
| D13S317        | 12                | NA     | 9, 13             | NA        | 11, 13            | NA    | 11, 12, 13        | NA        | 12             | 12                        | 10                | NA      |
| D16S539        | 13                | NA     | 12, 13            | NA        | 13                | NA    | 11, 13            | NA        | 13             | 13                        | 11, 12            | NA      |
| D5S818         | 11                | NA     | 12                | NA        | 12                | NA    | 11, 12            | NA        | 11             | 11                        | 15                | NA      |
| D7S820         | 9, 11             | NA     | 7, 11             | NA        | 8                 | NA    | 9, 14             | NA        | 9, 11          | 9, 11                     | 8                 | NA      |
| TH01           | 9                 | NA     | 6, 9.3            | NA        | 6, 9.3            | NA    | 6, 9.3            | NA        | 9              | 9                         | 8                 | NA      |
| TPOX           | 11                | NA     | 8, 11             | NA        | 8, 9              | NA    | 11, 12            | NA        | 11             | 11                        | 8                 | NA      |
| vWA            | 16, 17            | NA     | 17, 18            | NA        | 18                | NA    | 17, 18            | NA        | 16, 17         | 16, 17                    | 15                | NA      |
| Identity Match | N/A, see comments |        | N/A, see comments |           | N/A, see comments |       | N/A, see comments |           | 100%           |                           | N/A, see comments |         |

| Marker Name | 7              |         | 8              |           | 9              |         | 10             |                          |
|-------------|----------------|---------|----------------|-----------|----------------|---------|----------------|--------------------------|
|             | Sample Results | JH2-103 | Sample Results | JH2-079-3 | Sample Results | Panc14C | Sample Results | Pa02C (IBA# 26567-21-03) |
| AMEL        | X, Y           | NA      | X              | NA        | X              | NA      | X, Y           | X, Y                     |
| CSF1PO      | 11, 12         | NA      | 10, 12         | NA        | 12             | NA      | 12             | 12                       |
| D13S317     | 12             | NA      | 13             | NA        | 11             | NA      | 11, 13         | 11, 13                   |
| D16S539     | 11, 12         | NA      | 9, 12          | NA        | 11, 12         | NA      | 13             | 13                       |
| D5S818      | 10, 12         | NA      | 11, 12         | NA        | 11             | NA      | 12             | 12                       |
| D7S820      | 8, 12          | NA      | 8, 9           | NA        | 10, 11         | NA      | 8              | 8                        |

| Marker Name    | 7                 |         | 8                 |           | 9                 |         | 10             |                          |
|----------------|-------------------|---------|-------------------|-----------|-------------------|---------|----------------|--------------------------|
|                | Sample Results    | JH2-103 | Sample Results    | JH2-079-3 | Sample Results    | Panc14C | Sample Results | Pa02C (IBA# 26567-21-03) |
| TH01           | 8                 | NA      | 9                 | NA        | 6                 | NA      | 6, 9.3         | 6, 9.3                   |
| TPOX           | 6, 9              | NA      | 9                 | NA        | 8                 | NA      | 8, 9           | 8, 9                     |
| vWA            | 13, 18            | NA      | 15, 16            | NA        | 17, 18            | NA      | 18             | 18                       |
| Identity Match | N/A, see comments |         | N/A, see comments |           | N/A, see comments |         | 100%           |                          |

| Sample ID | Remarks                                                                                                                                                                                                                                                                                                                                                                                                                                                                                                                                                                                                                                                                                                                                                                                                                                                                                                                                                                                                                                                                                                                                                                                                                                                                                     |
|-----------|---------------------------------------------------------------------------------------------------------------------------------------------------------------------------------------------------------------------------------------------------------------------------------------------------------------------------------------------------------------------------------------------------------------------------------------------------------------------------------------------------------------------------------------------------------------------------------------------------------------------------------------------------------------------------------------------------------------------------------------------------------------------------------------------------------------------------------------------------------------------------------------------------------------------------------------------------------------------------------------------------------------------------------------------------------------------------------------------------------------------------------------------------------------------------------------------------------------------------------------------------------------------------------------------|
| 1         | <p>NA in the table indicates profile data is not available for comparison purposes for this sample. The genetic profile for the sample was compared to the cell line genetic profiles available in the DSMZ STR database and did not match any other reported profiles in the DSMZ database. Without a sample representing the original source material the sample was derived from, it is not possible to make any interpretations in terms of authentication of the cell line other than it has a unique profile not found in the current public databases. The genetic profile established for this sample should be published in subsequent manuscripts and can be used for future comparisons for this cell line.</p> <p>The genetic profile for the sample was identical to the profile reported for this cell line, but this sample also tested positive for mouse origin DNA indicating contamination with mouse origin material. If the sample was propagated using mouse origin materials (feeder cell line, mouse serum, etc.), then this material is the source of the mouse origin DNA. However, if no mouse origin materials were used in the propagation of this sample, then the positive test result may be indicative of contamination with a mouse origin cell line.</p> |
| 2         | <p>NA in the table indicates profile data is not available for comparison purposes for this sample. The genetic profile for the sample was compared to the cell line genetic profiles available in the DSMZ STR database and did not match any other reported profiles in the DSMZ database. Without a sample representing the original source material the sample was derived from, it is not possible to make any interpretations in terms of authentication of the cell line other than it has a unique profile not found in the current public databases. The genetic profile established for this sample should be published in subsequent manuscripts and can be used for future comparisons for this cell line.</p> <p>The genetic profile for the sample was identical to the profile reported for this cell line, but this sample also tested positive for mouse origin DNA indicating contamination with mouse origin material. If the sample was propagated using mouse origin materials (feeder cell line, mouse serum, etc.), then this material is the source of the mouse origin DNA. However, if no mouse origin materials were used in the propagation of this sample, then the positive test result may be indicative of contamination with a mouse origin cell line.</p> |
| 3         | <p>NA in the table indicates profile data is not available for comparison purposes for this sample. The genetic profile for the sample was compared to the cell line genetic profiles available in the DSMZ STR database and did not match any other reported profiles in the DSMZ database. Without a sample representing the original source material the sample was derived from, it is not possible to make any interpretations in terms of authentication of the cell line other than it has a unique profile not found in the current public databases. The genetic profile established for this sample should be published in subsequent manuscripts and can be used for future comparisons for this cell line.</p>                                                                                                                                                                                                                                                                                                                                                                                                                                                                                                                                                                  |
| 4         | <p>NA in the table indicates profile data is not available for comparison purposes for this sample. The genetic profile for the sample was compared to the cell line genetic profiles available in the DSMZ STR database and did not match any other reported profiles in the DSMZ database. Without a sample representing the original source material the sample was derived from, it is not possible to make any interpretations in terms of authentication of the cell line other than it has a unique profile not found in the current public databases. The genetic profile established for this sample should be published in subsequent manuscripts and can be used for future comparisons for this cell line.</p> <p>The genetic profile for the sample was identical to the profile reported for this cell line, but this sample also tested positive for mouse origin DNA indicating contamination with mouse origin material. If the sample was propagated using mouse origin materials (feeder cell line, mouse serum, etc.), then this material is the source of the mouse origin DNA. However, if no mouse origin materials were used in the propagation of this sample, then the positive test result may be indicative of contamination with a mouse origin cell line.</p> |

| Sample ID | Remarks                                                                                                                                                                                                                                                                                                                                                                                                                                                                                                                                                                                                                                                                                                             |
|-----------|---------------------------------------------------------------------------------------------------------------------------------------------------------------------------------------------------------------------------------------------------------------------------------------------------------------------------------------------------------------------------------------------------------------------------------------------------------------------------------------------------------------------------------------------------------------------------------------------------------------------------------------------------------------------------------------------------------------------|
| 5         | The genetic profile for the sample was identical to the profile reported for this cell line, but this sample also tested positive for mouse origin DNA indicating contamination with mouse origin material. If the sample was propagated using mouse origin materials (feeder cell line, mouse serum, etc.), then this material is the source of the mouse origin DNA. However, if no mouse origin materials were used in the propagation of this sample, then the positive test result may be indicative of contamination with a mouse origin cell line.                                                                                                                                                           |
| 6         | NA in the table indicates profile data is not available for comparison purposes for this sample. The genetic profile for the sample was compared to the cell line genetic profiles available in the DSMZ STR database and did not match any other reported profiles in the DSMZ database. Without a sample representing the original source material the sample was derived from, it is not possible to make any interpretations in terms of authentication of the cell line other than it has a unique profile not found in the current public databases. The genetic profile established for this sample should be published in subsequent manuscripts and can be used for future comparisons for this cell line. |
| 7         | NA in the table indicates profile data is not available for comparison purposes for this sample. The genetic profile for the sample was compared to the cell line genetic profiles available in the DSMZ STR database and did not match any other reported profiles in the DSMZ database. Without a sample representing the original source material the sample was derived from, it is not possible to make any interpretations in terms of authentication of the cell line other than it has a unique profile not found in the current public databases. The genetic profile established for this sample should be published in subsequent manuscripts and can be used for future comparisons for this cell line. |
| 8         | NA in the table indicates profile data is not available for comparison purposes for this sample. The genetic profile for the sample was compared to the cell line genetic profiles available in the DSMZ STR database and did not match any other reported profiles in the DSMZ database. Without a sample representing the original source material the sample was derived from, it is not possible to make any interpretations in terms of authentication of the cell line other than it has a unique profile not found in the current public databases. The genetic profile established for this sample should be published in subsequent manuscripts and can be used for future comparisons for this cell line. |
| 9         | NA in the table indicates profile data is not available for comparison purposes for this sample. The genetic profile for the sample was compared to the cell line genetic profiles available in the DSMZ STR database and did not match any other reported profiles in the DSMZ database. Without a sample representing the original source material the sample was derived from, it is not possible to make any interpretations in terms of authentication of the cell line other than it has a unique profile not found in the current public databases. The genetic profile established for this sample should be published in subsequent manuscripts and can be used for future comparisons for this cell line. |
| 10        | The genetic profile for the sample was identical to the profile reported for this cell line, but this sample also tested positive for mouse origin DNA indicating contamination with mouse origin material. If the sample was propagated using mouse origin materials (feeder cell line, mouse serum, etc.), then this material is the source of the mouse origin DNA. However, if no mouse origin materials were used in the propagation of this sample, then the positive test result may be indicative of contamination with a mouse origin cell line.                                                                                                                                                           |
